# Supplementary material for: Nontoxic photoluminescent tin oxide nanoparticles for cell imaging: deep eutectic solvent mediated synthesis, tuning and mechanism
Source: Royal Society of Chemistry journal article supplement (doi:10.1039/d1ma00042j), 2021-01-01
Supplement: d1ma00042j1.pdf [file d1ma00042j1.pdf]

Supporting Information

**Nontoxic photoluminescent tin oxide nanoparticle for cell imaging: Deep eutectic  
solvent mediated synthesis, tuning and mechanism**

*Laboni Das<sup>a,b</sup>, Linmariya Devassy Koonathan<sup>c</sup>, Amit Kunwar<sup>a</sup>, Suman Neogy<sup>d</sup>, Anil K.*

*Debnath<sup>e</sup>, Soumyakanti Adhikari<sup>\*a</sup>*

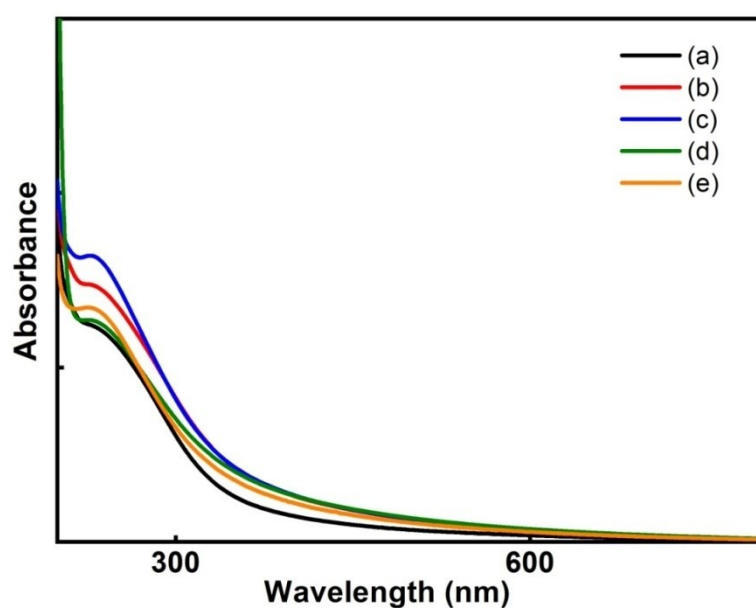

**Fig. S1.** UV-Vis absorption spectra of the as synthesized tin oxide nanoparticles at 80°C dissolved in nanopure water after separation from the host matrix, reline; after heating for (a) 30min; (b) 60min; (c) 90min; (d) 2hrs; (e) 3hrs.

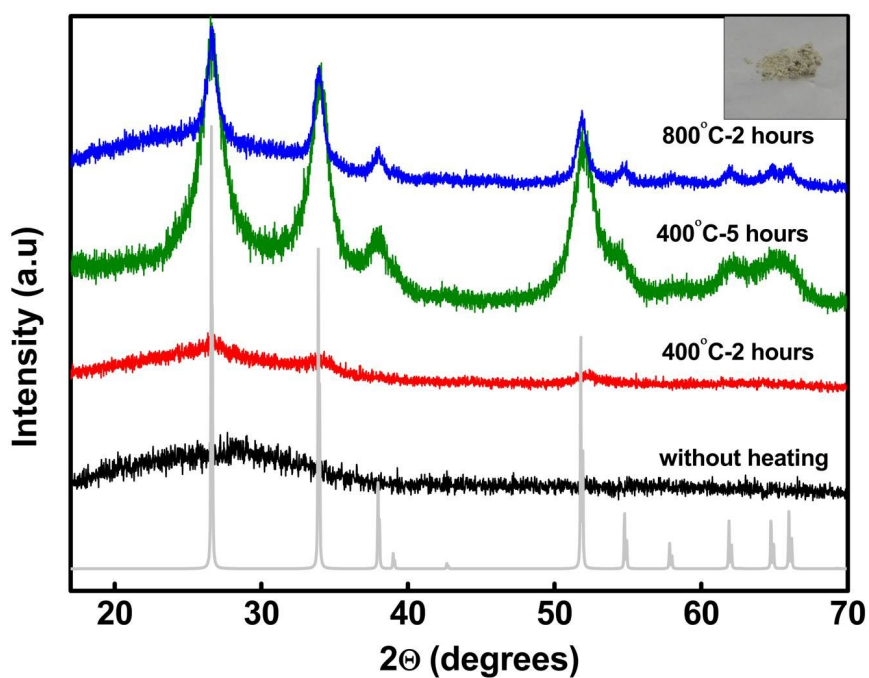

**Fig. S2.** XRD spectra of the synthesized tin oxide nanoparticles (a) before calcination (b) calcined at 400°C for 2 hours (c) calcined at 400°C for 5 hours (d) 800°C for 2 hours. Inset: Tin oxide nanoparticles extracted in powder form and calcined at 400°C.

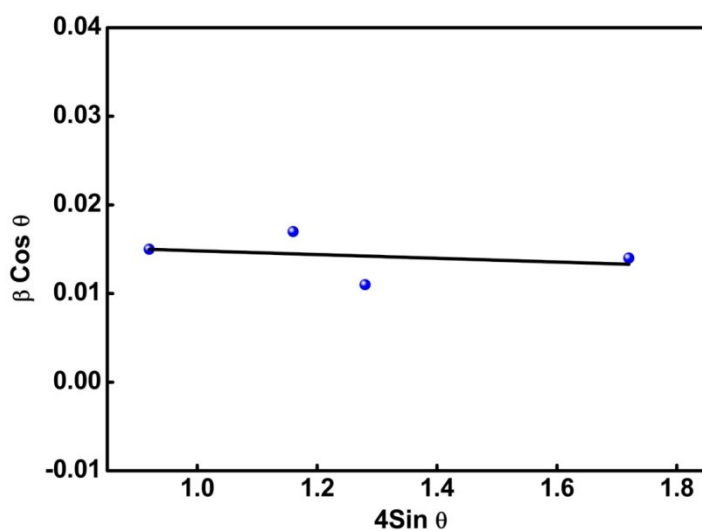

**Fig. S3.** Plot of  $\beta \cos\theta$  vs  $4\sin\theta$  for  $\text{SnO}_2$  nanoparticles for crystal size and strain analysis from XRD peak broadening.

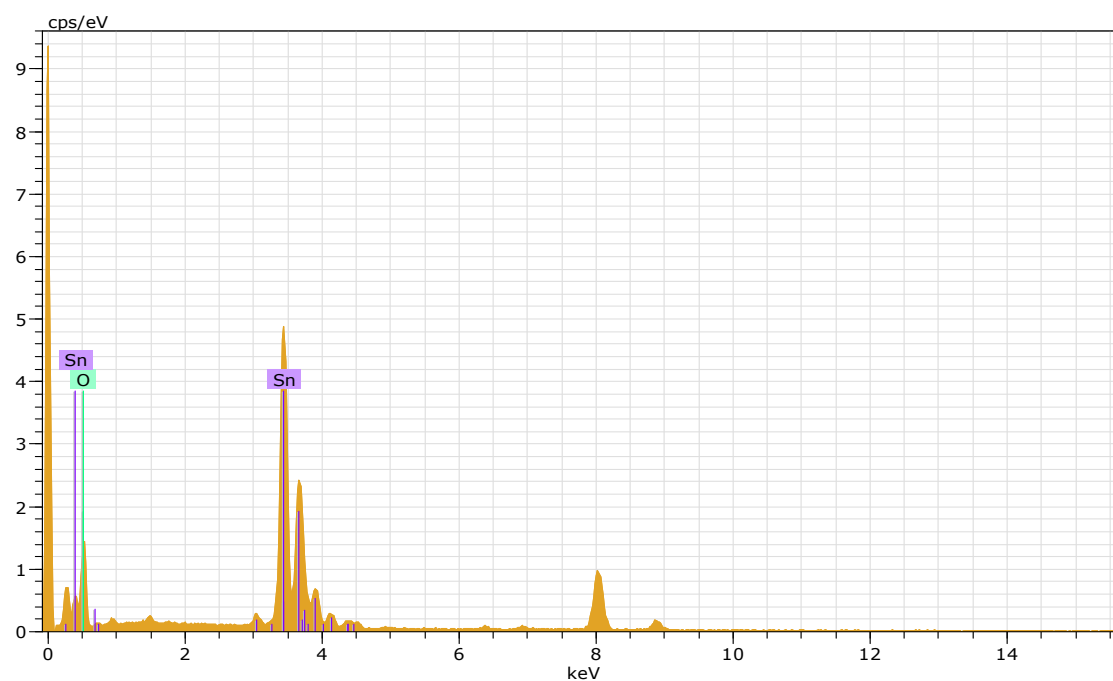

**Fig. S4.** EDX spectrum of the SnO<sub>2</sub> nanoparticles synthesized via radiation method (107kGy)

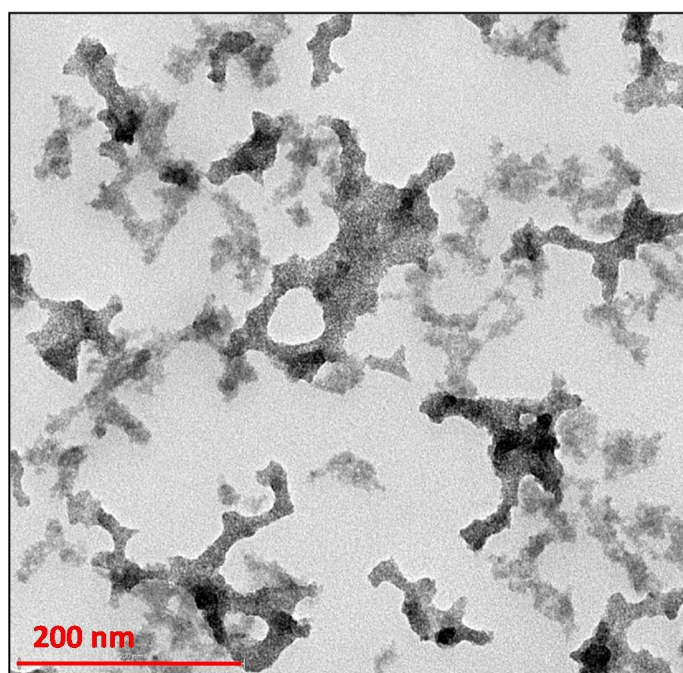

**Fig. S5.** TEM image of SnO<sub>2</sub> NPs synthesized in reline matrix via  $\gamma$ -irradiation
